# Supplementary material for: A model-based prediction and analysis of seasonal and tidal influence on pollutants distribution from city outfalls of river Ganges in West Bengal, India and its mapping using GIS tool
Source: PLOS journal article supplement (doi:10.1371/journal.pwat.0000008), 2022-02-15
Supplement: S2 (10.1371/journal.pwat.0000008.s002) [file journal.pwat.0000008.s002]

**Supporting Information 2 (S2)**

**Supplementary Figure**

**
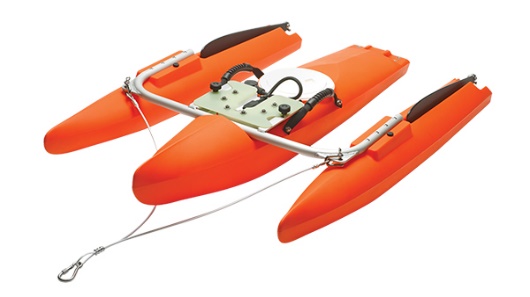
**

**S2 Fig1: ADCP (Acoustic Doppler current profiler) device**

**S2 Fig2:** **Identification of Outfalls in Left Bank of the river Ganga from South to North during 2014 from Howrah Station to Khardah, 24 Parganas (North), West Bengal, India**

| **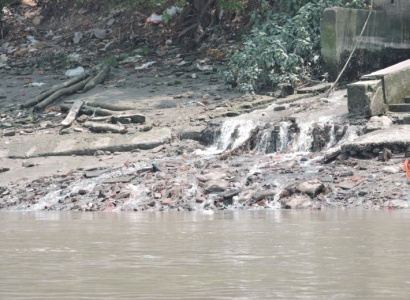**  **Annapurna Ghat, Bagbazar**  **N22036'19.2'' E088021'53.5''** | **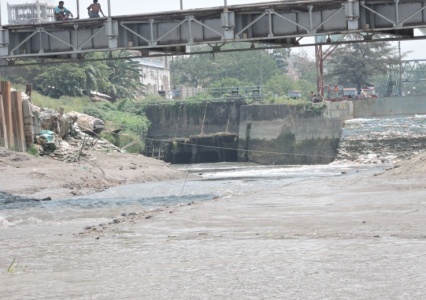**  **Circular Canal, Bagbazar**  **N22036'29.66" E088°22'00.96"** | | **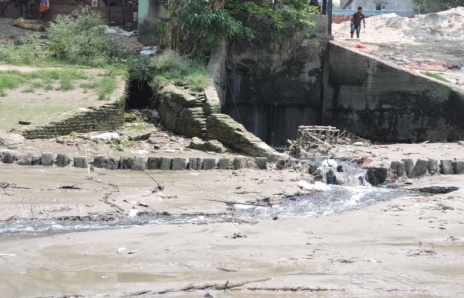**  **Jaymataji Ghat, Chitpur**  **N22036'48.6'' E088022'06.2''** |
| --- | --- | --- | --- |
| **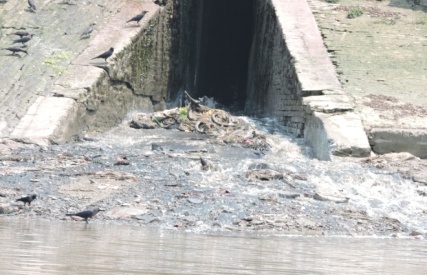**  **Cossipore area I, Cossipore**  **N22037'02.3'' E088022'05''** | **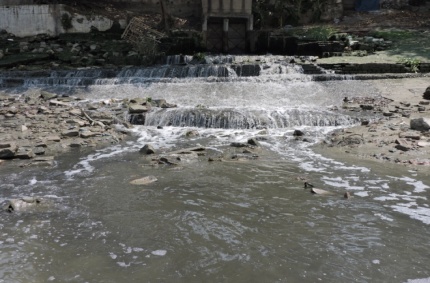**  **Cossipore area II, Cossipore**  **N22037'08.2'' E088022'05.3''** | | **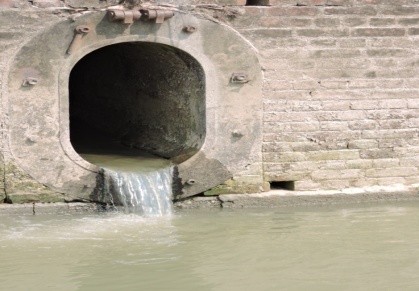**  **Alambazar, Baranagar**  **N22°38’52.0’’ E088°21’31.8’’** |
| **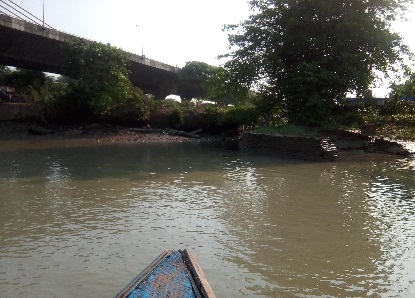**  **Dakshineswar Canal, Dakshineswar**  **N22°39'08.75'' E88°21'27.60''** | **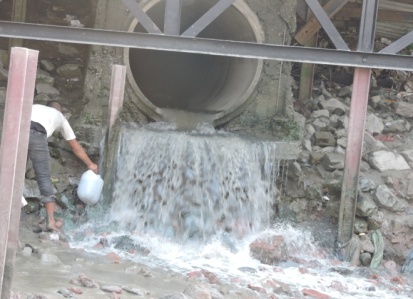**  **New Jetty, Dakshineswar**  **N22°39'13.2'' E088°21'27.1''** | | **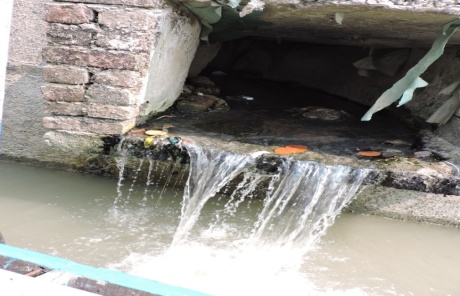**  **Patbari, Ariadaha**  **N22°40'04.6'' E088°21'31.3''** |
| **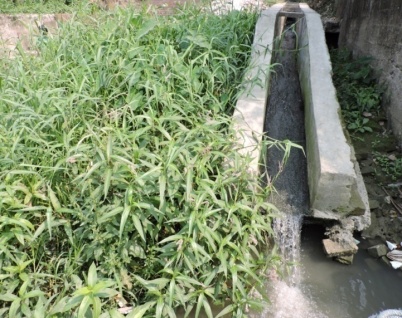**  **Fatik Mallik Ghat, Ariadaha**  **N22°40'10.3'' E088°21'33.9''** | | **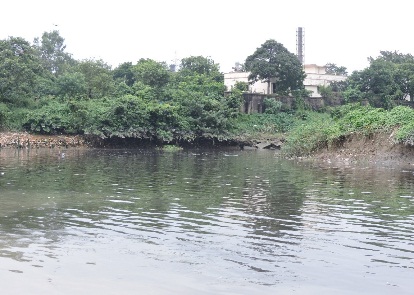**  **Khardah Khal, Khardah**  **N22°43'35.28" E088°21'42.97"** | |

**S2 Fig3:** **Identification of Outfalls in Right Bank of the river Ganga from South to North during 2014 from Howrah Station to Khardah, 24 Parganas (North), West Bengal, India**

| **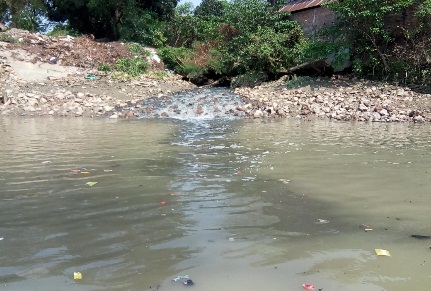**  **Ghusuri, Howrah**  **N22°36'37.18'' E088°21'26.37''** | **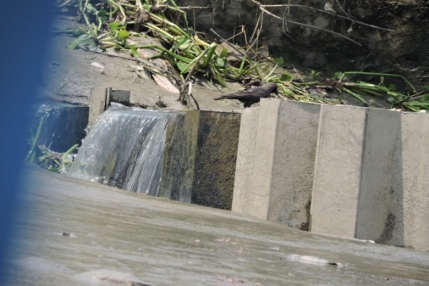**  **Jagannath Ghat, Belur Bazar**  **N22°37'42.9'' E088°21'33.3''** | **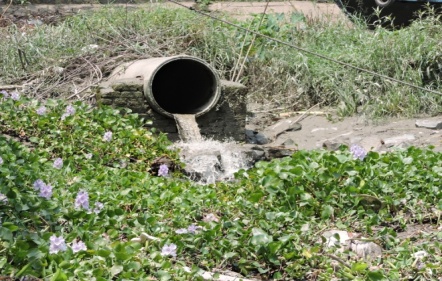**  **Kathgola Ghat, Belur**  **N22037’48.8’’ E088021’30.6’’** |
| --- | --- | --- |
| **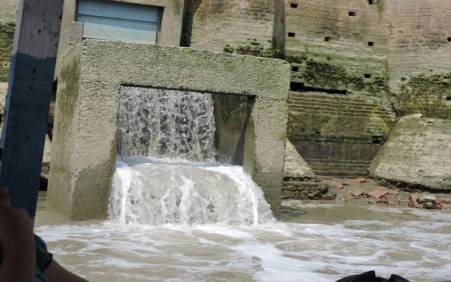**  **Rashbari Ghat, Belur**  **N22°38'14.6'' E088°21'18.3''** | **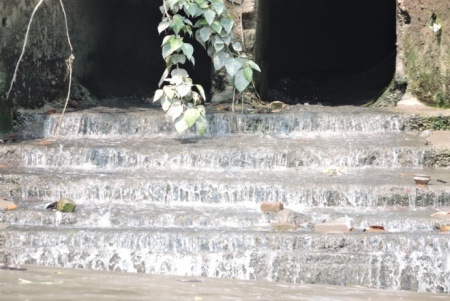**  **Dewangazi, Bally**  **N22°38'34.3'' E088°21'10.5''** | **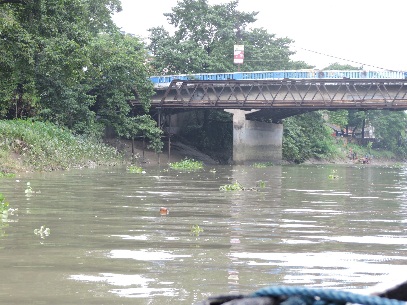**  **Ballykhal, Bally**  **N22°39'18.33’’ E088°20'58.75"** |
| **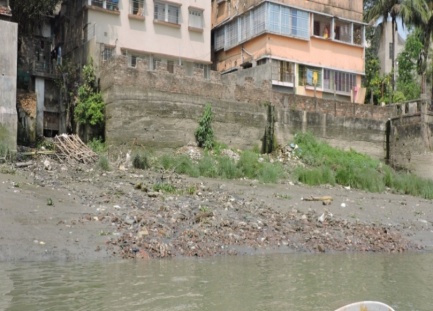**  **Ramghat, Uttarpara**  **N22°39'49.2'' E088°21'04.0''** | **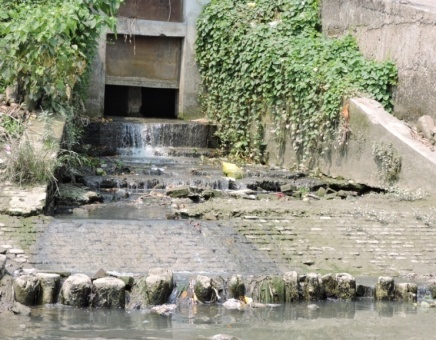**  **Doltala, Uttarpara**  **N22040'05.2'' E088021'05.4''** | **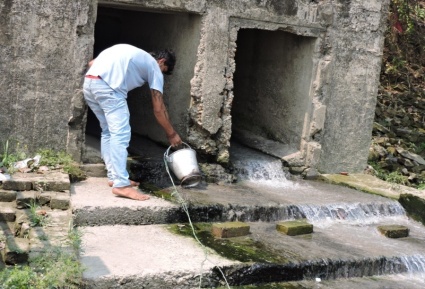**  **Bottala, Hindmotor**  **N22°40'55.3'' E088°21'21.2''** |

| **S2 Fig4:** **Zone of influence of DO, BOD, Nitrate nitrogen and Phosphorus at Circular Canal during pre-monsoon low tide** | **S2 Fig5:** **Zone of influence of DO and BOD at Circular Canal during monsoon low tide** | **S2 Fig6:** **Zone of influence of DO, BOD and Phosphorus at Circular Canal during post-monsoon low tide** |
| --- | --- | --- |
| **S2 Fig7:** **Zone of influence of DO, BOD, Nitrate nitrogen and Phosphorus at Ghusuri during pre-monsoon low tide** | **S2 Fig8:** **Zone of influence of BOD at Ghusuri during monsoon low tide** | **S2 Fig9:** **Zone of influence of DO, BOD and Phosphorus at Ghusuri during post-monsoon low tide** |
| **S2 Fig10:** **Zone of influence of DO, BOD, Nitrate nitrogen and Phosphorus at Dakshineswar Canal during pre-monsoon low tide** | **S2 Fig11:** **Zone of influence of DO, BOD, Nitrate nitrogen and Phosphorus at Dakshineswar Canal during monsoon low tide** | **S2 Fig12:** **Zone of influence of DO, BOD, Nitrate nitrogen and Phosphorus at Dakshineswar Canal during post-monsoon low tide** |

| **S2 Fig13:** **Zone of influence of DO, BOD, Nitrate nitrogen and Phosphorus at Ballykhal during pre-monsoon low tide** | **S2 Fig14:** **Zone of influence of DO, BOD, Nitrate nitrogen and Phosphorus at Ballykhal during monsoon low tide** | **S2 Fig15:** **Zone of influence of DO, BOD, Nitrate nitrogen and Phosphorus at Ballykhal during post-monsoon low tide** |
| --- | --- | --- |
| **S2 Fig16:** **Zone of influence of DO, BOD, Nitrate nitrogen and Phosphorus at Khardah Khal during pre-monsoon low tide** | **S2 Fig17:** **Zone of influence of DO, BOD, Nitrate nitrogen and Phosphorus at Khardah Khal during monsoon low tide** | **S2 Fig18:** **Zone of influence of DO, BOD, Nitrate nitrogen and Phosphorus at Khardah Khal during post-monsoon low tide** |
| **S2 Fig19:** **Zone of influence of BOD at selected outfalls during pre-monsoon low tide** | **S2 Fig20:** **Zone of influence of BOD at selected outfalls during monsoon low tide** | **S2 Fig21:** **Zone of influence of BOD at selected outfalls during post-monsoon low tide** |
| **S2 Fig22:** **Zone of influence of DO at selected outfalls during pre-monsoon low tide** | **S2 Fig23:** **Zone of influence of DO at selected outfalls during monsoon low tide** | **S2 Fig24:** **Zone of influence of DO at selected outfalls during post-monsoon low tide** |
| **S2 Fig25:** **Zone of influence of Nitrate nitrogen at selected outfalls during pre-monsoon low tide** | **S2 Fig26:** **Zone of influence of Nitrate nitrogen at selected outfalls during monsoon low tide** | **S2 Fig27:** **Zone of influence of Nitrate nitrogen at selected outfalls during post-monsoon low tide** |
| **S2 Fig28:** **Zone of influence of Phosphorus at five selected outfalls during pre-monsoon low tide** | **S2 Fig29:** **Zone of influence of Phosphorus at five selected outfalls during monsoon low tide** | **S2 Fig30:** **Zone of influence of Phosphorus at five selected outfalls during post-monsoon low tide** |
|  |  |  |
